# Supplementary material
Source: Springer Nature journal article supplement (https://www.springermedizin.de/resource/supplementary/12936_2011_1857_MOESM13_ESM.pdf/9541930)

**A**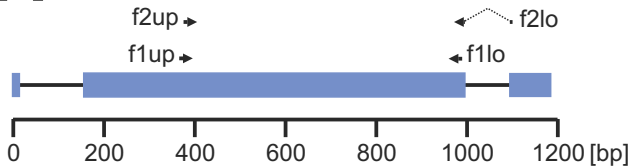**B**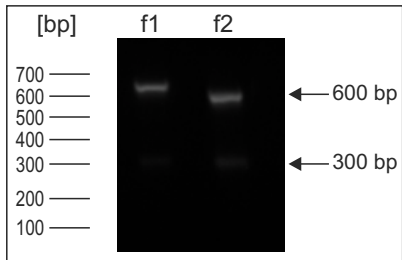

Supplement: MOESM13 [file 9541930]
